# Supplementary material
Source: PubMed Central journal article supplement (PMC7791318)
Supplement: mmc1.pdf [file mmc1.pdf]

**Figure S1. Proportion of COVID positive patients by month**

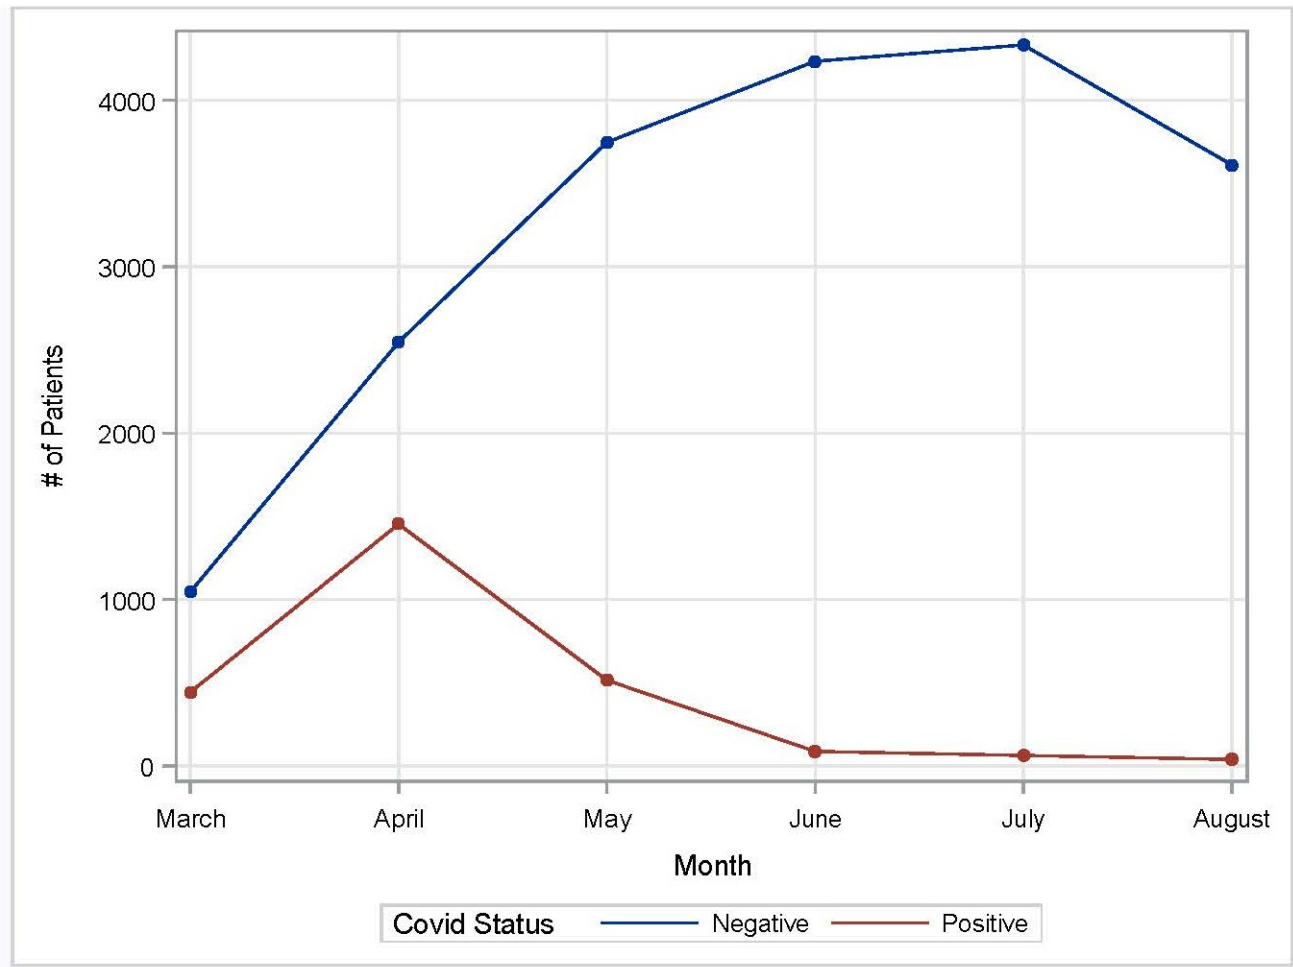

**Figure S2. Medical and surgical admissions by month**

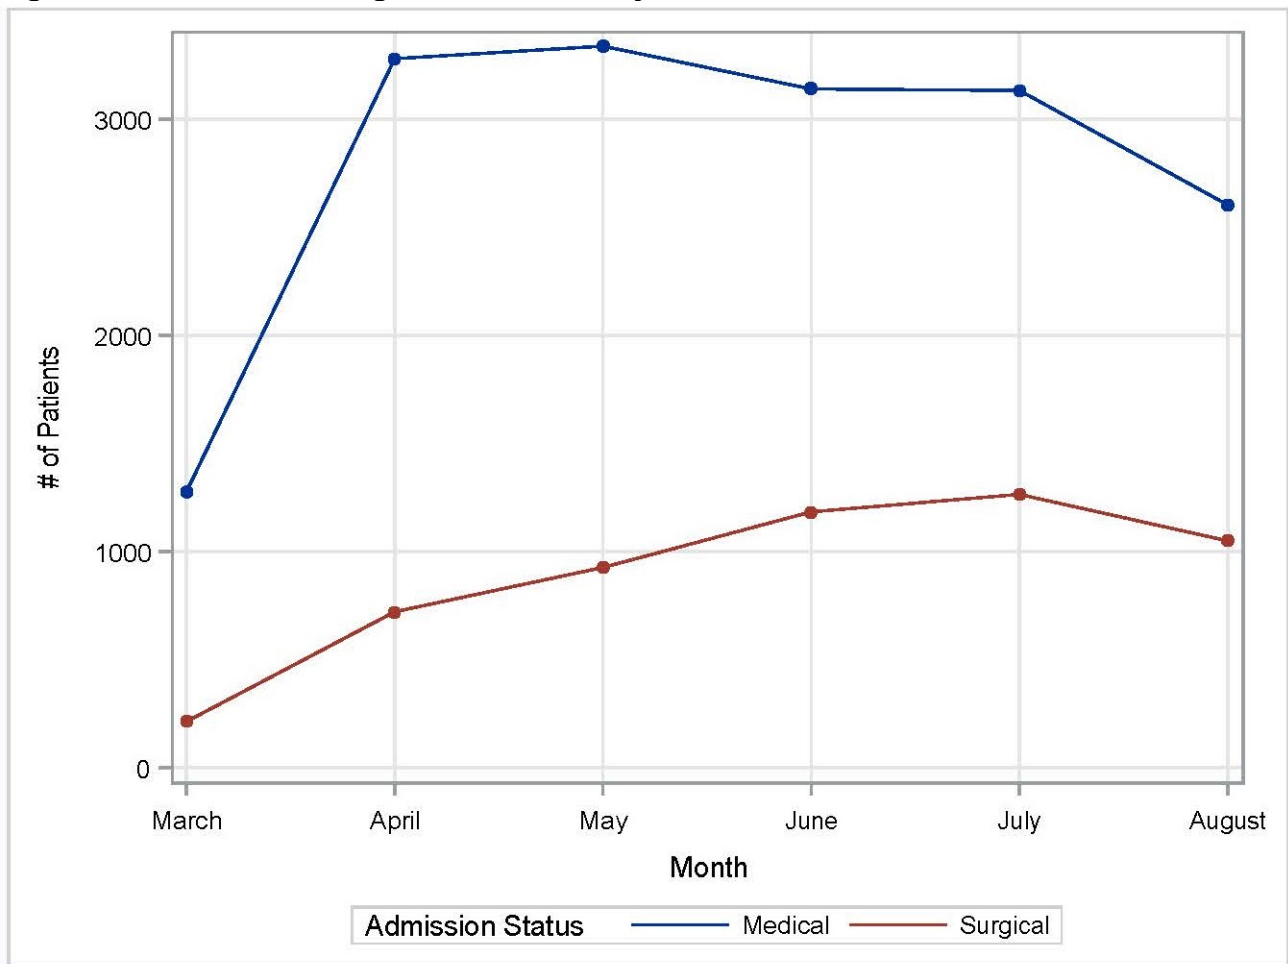

**Figure S3. Kaplan-Meier curve and forest plot for sensitivity analysis utilizing historical control data.**

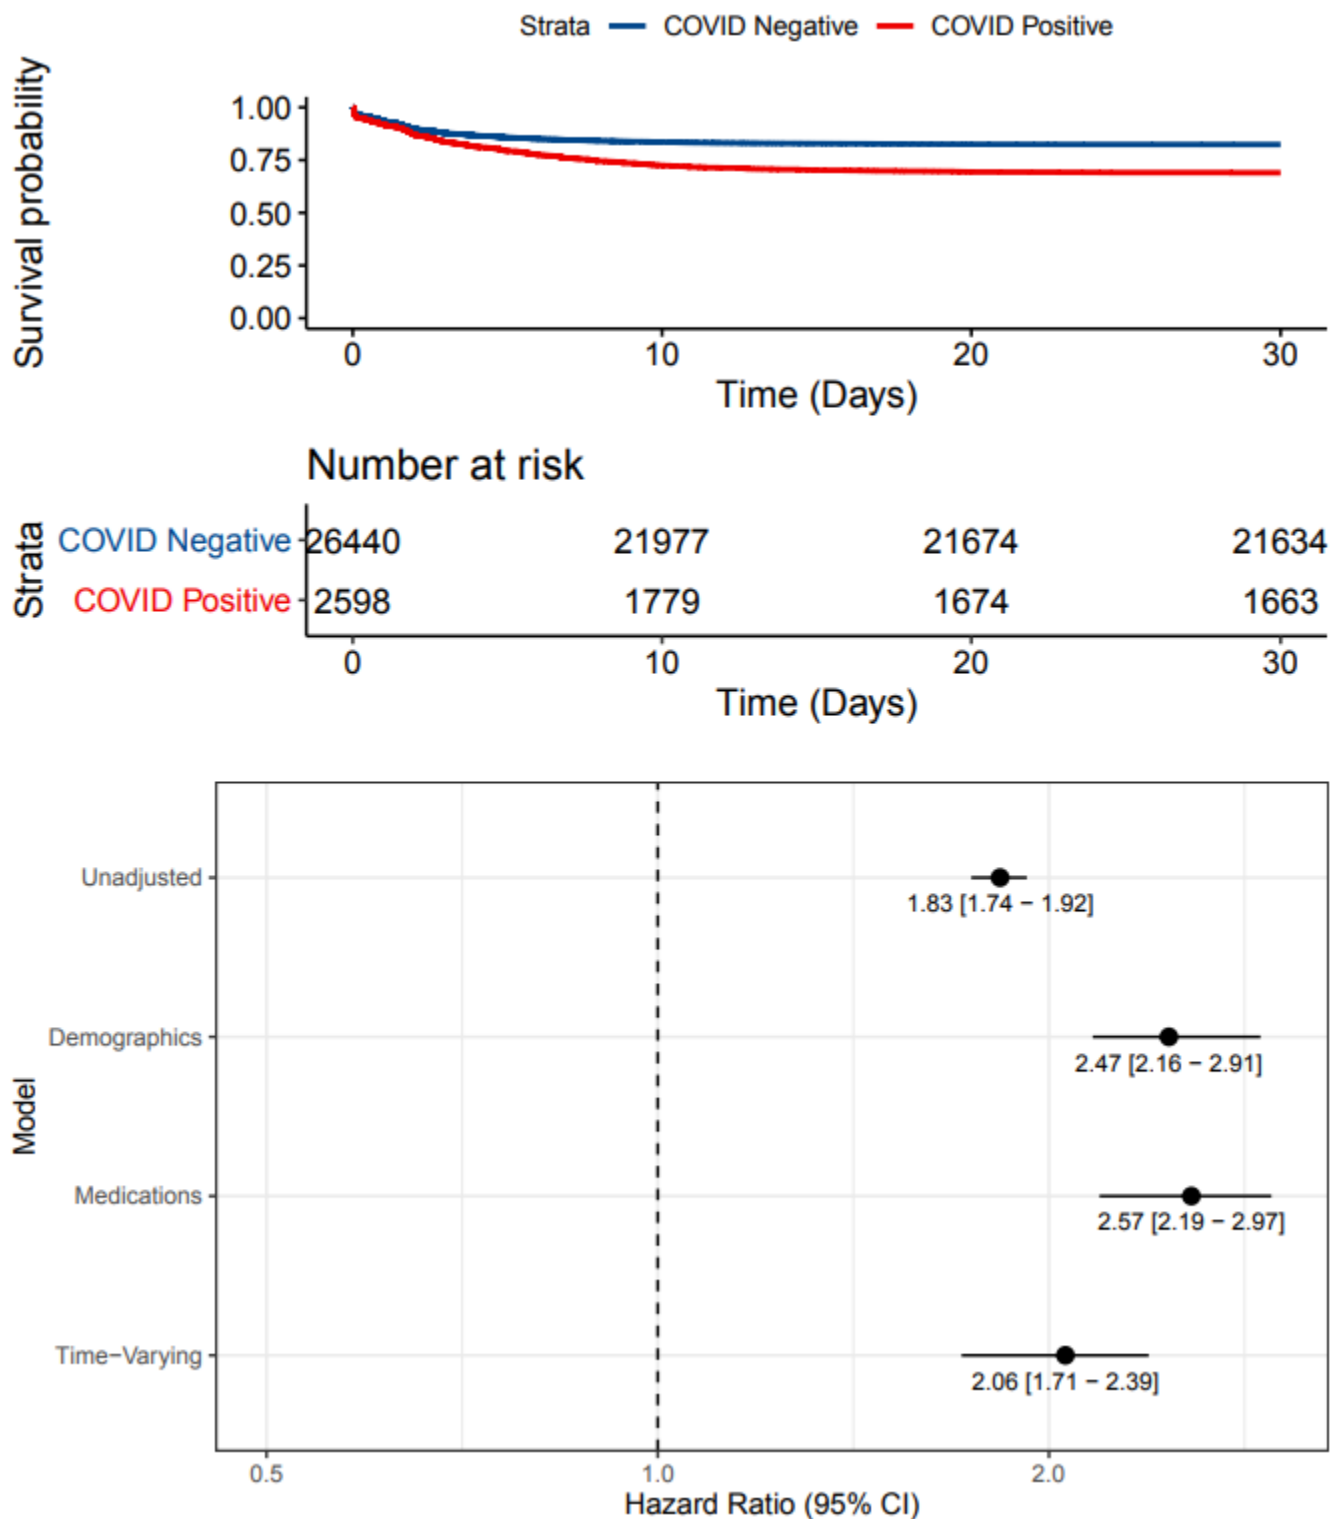

**Figure S4. Kaplan-Meier curve and forest plot for sensitivity analysis for inclusion of 30-day readmission data**

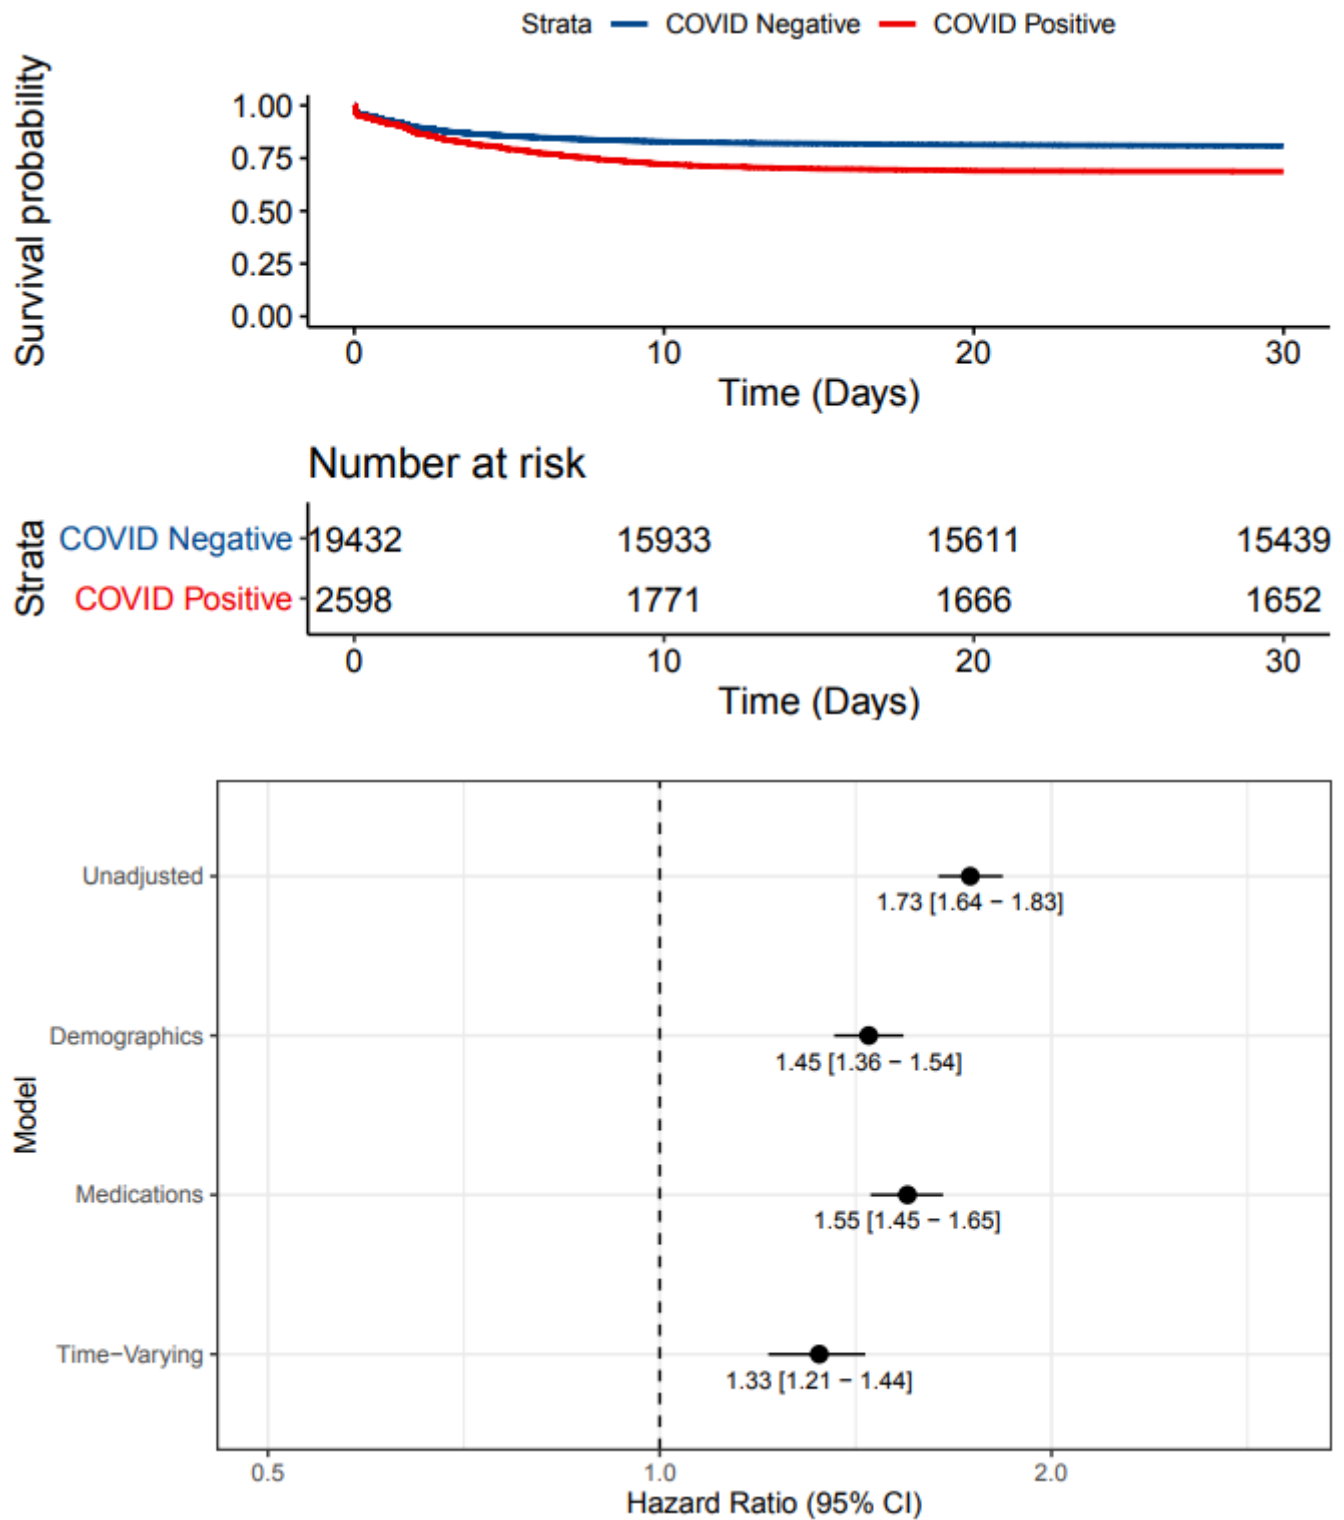

**Figure S5. Kaplan-Meier curve and forest plot for sensitivity analysis using only hospital-acquired acute kidney injury**

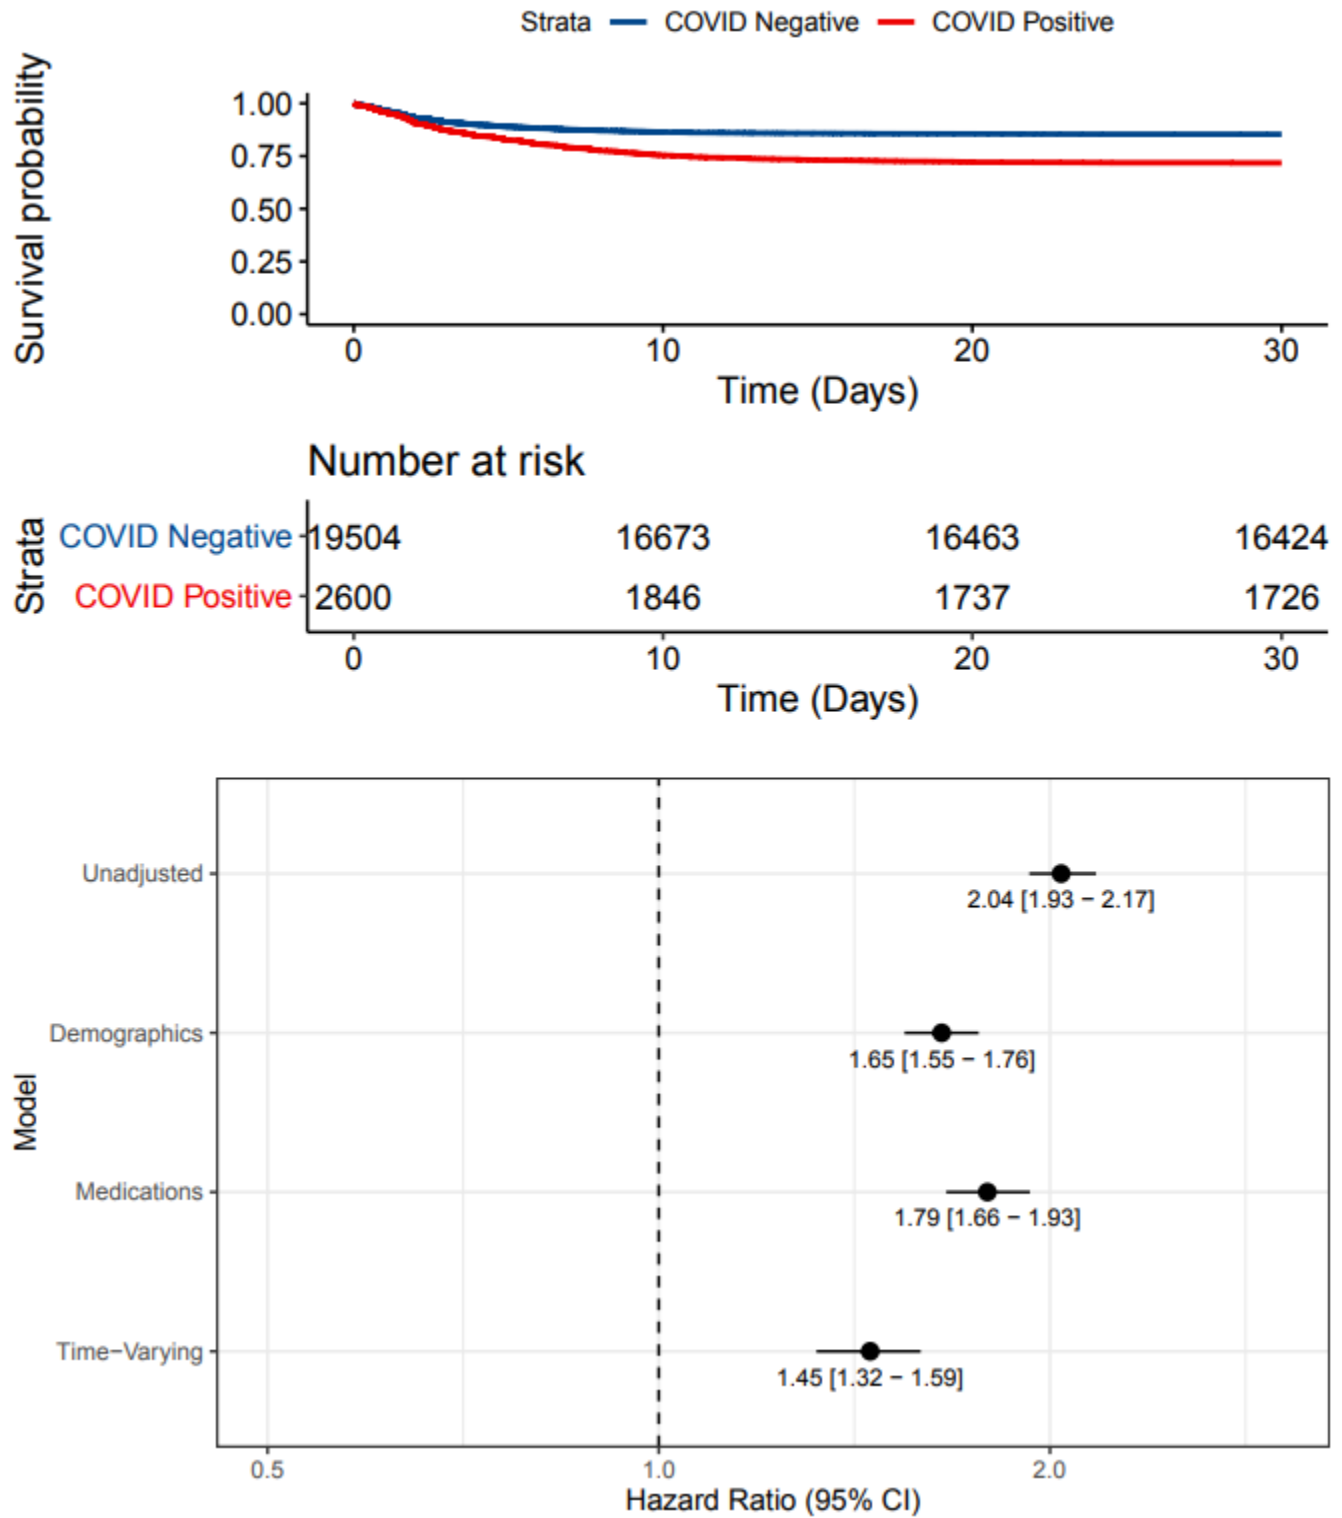

**Table S1. Timeline of COVID testing and cancellation of elective procedures**

| Key changes to clinical care | Timeline               |
|------------------------------|------------------------|
| COVID testing                |                        |
| By criteria                  | 3/1/2020 to 4/23/2020  |
| Universal testing            | 4/24/2020 to study end |
| Elective procedures          |                        |
| Cancellations                | 3/18/2020              |
| Resumption                   | 6/1/2020               |

*The criteria for testing varied over time. Initially cough and fever, followed by sequential addition of other respiratory (sore throat, rhinorrhea) and gastrointestinal (diarrhea) symptoms, followed by removal of fever. Initially, travel to COVID hotspot areas was required but this was later removed.*

**Table S2. Baseline and hospitalization variables by AKI status among patients with COVID-19**

| Variables                                     | No AKI<br>(N=1804) | Stage 1 AKI<br>(N=508) | Stage 2 or Higher AKI<br>(N=288) | p-value1 | P-value2 |
|-----------------------------------------------|--------------------|------------------------|----------------------------------|----------|----------|
| <b>Demographic</b>                            |                    |                        |                                  |          |          |
| Age                                           | 63.2 (49.2,77.9)   | 73.1 (61.7,84.4)       | 65.6 (56.5,77.6)                 | <0.001   | <0.001   |
| Race, Black                                   | 416 (23.1%)        | 150 (29.5%)            | 80 (27.8%)                       | 0.002    | 0.6      |
| Ethnicity, Hispanic                           | 535 (29.7%)        | 102 (20.1%)            | 88 (30.6%)                       | 0.002    | <0.001   |
| Sex, Female                                   | 904 (50.1%)        | 260 (51.2%)            | 116 (40.3%)                      | 0.2      | 0.003    |
| <b>Comorbidities</b>                          |                    |                        |                                  |          |          |
| Congestive heart failure                      | 266 (14.7%)        | 169 (33.3%)            | 67 (23.3%)                       | <0.001   | 0.003    |
| Chronic obstructive pulmonary disease         | 532 (29.5%)        | 199 (39.2%)            | 100 (34.7%)                      | <0.001   | 0.2      |
| Liver disease                                 | 186 (10.3%)        | 46 (9.1%)              | 38 (13.2%)                       | 0.9      | 0.07     |
| Malignancy                                    | 171 (9.5%)         | 84 (16.5%)             | 40 (13.9%)                       | <0.001   | 0.3      |
| Chronic Kidney Disease                        | 211 (11.7%)        | 150 (29.5%)            | 65 (22.6%)                       | <0.001   | 0.03     |
| Hypertension                                  | 1049 (58.1%)       | 399 (78.5%)            | 210 (72.9%)                      | <0.001   | 0.07     |
| Diabetes                                      | 588 (32.6%)        | 268 (52.8%)            | 141 (49%)                        | <0.001   | 0.3      |
| Elixhauser comorbidity score                  | 4 (1,7)            | 7 (3,10)               | 6 (3,10)                         | <0.001   | 0.03     |
| <b>Vitals</b>                                 |                    |                        |                                  |          |          |
| Systolic, minimum                             | 97 (89,106)        | 96 (84,106)            | 90 (73,105)                      | <0.001   | <0.001   |
| Diastolic, minimum                            | 54 (48,60)         | 51 (43,59)             | 50 (41,57)                       | <0.001   | 0.1      |
| Pulse                                         | 106 (95,119)       | 107 (93,124)           | 117 (101,132)                    | <0.001   | <0.001   |
| Respiratory rate                              | 26 (22,34)         | 29 (22,39)             | 36 (24,45)                       | <0.001   | <0.001   |
| Spo2                                          | 90 (85,93)         | 88 (82,92)             | 85 (76,92)                       | <0.001   | 0.001    |
| Temp                                          | 100.9 (99.7,102.4) | 101.4 (99.8,102.7)     | 101.6 (99.9,103)                 | <0.001   | 0.1      |
| <b>Medication Use</b>                         |                    |                        |                                  |          |          |
| Angiotensin converting enzyme inhibitor       | 188 (10.4%)        | 48 (9.4%)              | 26 (9%)                          | 0.4      | 0.8      |
| Aminoglycoside                                | 0 (0%)             | 0 (0%)                 | 2 (0.7%)                         | 0.03     | 0.06     |
| Angiotensin II receptor blocker               | 164 (9.1%)         | 49 (9.6%)              | 20 (6.9%)                        | 0.7      | 0.2      |
| Diuretics, Potassium sparing                  | 27 (1.5%)          | 5 (1%)                 | 7 (2.4%)                         | 0.9      | 0.1      |
| Diuretics, Loop                               | 402 (22.3%)        | 191 (37.6%)            | 88 (30.6%)                       | <0.001   | 0.05     |
| Non-steroidal anti-inflammatory drugs         | 215 (11.9%)        | 31 (6.1%)              | 19 (6.6%)                        | <0.001   | 0.8      |
| Proton pump inhibitor                         | 419 (23.2%)        | 123 (24.2%)            | 46 (16%)                         | 0.3      | 0.006    |
| Vasopressor                                   | 76 (4.2%)          | 77 (15.2%)             | 106 (36.8%)                      | <0.001   | <0.001   |
| <b>Blood Chemistry</b>                        |                    |                        |                                  |          |          |
| Sodium, mEq/L                                 | 141 (139,144)      | 141 (138,144)          | 140 (137,143)                    | 0.02     | 0.005    |
| Potassium, mEq/L                              | 4.4 (4.1,4.7)      | 4.4 (4.1,4.9)          | 4.4 (4.1,4.8)                    | 0.3      | 0.5      |
| Chloride, mEq/L                               | 105 (103,108)      | 105 (101,109)          | 104 (100,108)                    | <0.001   | 0.02     |
| Anion gap, mEq/L                              | 15 (13,17)         | 16 (14,18)             | 16 (14,18)                       | <0.001   | 0.4      |
| Blood urea nitrogen, mg/dl                    | 19 (13,28)         | 29 (19,40)             | 27 (18,37)                       | <0.001   | 0.06     |
| Creatinine, mg/dl                             | 1 (0.8,1.2)        | 1.2 (0.9,1.7)          | 1.1 (0.9,1.5)                    | <0.001   | 0.05     |
| Glucose, Maximum, mg/dl                       | 144 (117,208.5)    | 185 (134,263)          | 188 (144,286)                    | <0.001   | 0.1      |
| Glucose, Minimum, mg/dl                       | 89 (79,98)         | 95 (80,120)            | 103 (87,132)                     | <0.001   | 0.003    |
| Hemoglobin, g/dl                              | 13.6 (12.2,14.7)   | 13.3 (11.4,14.4)       | 13.7 (12.1,15.2)                 | 0.02     | <0.001   |
| Platelet Count, *1000 per mm <sup>3</sup>     | 294 (216,385)      | 249 (188,343)          | 253 (195,340)                    | <0.001   | 0.3      |
| <b>Inflammation</b>                           |                    |                        |                                  |          |          |
| D-dimer                                       | 1.6 (0.8,3.8)      | 2.1 (1.1,5.8)          | 3.2 (1.2,8.9)                    | <0.001   | 0.006    |
| C-reactive protein, high sensitivity          | 102.1 (44.9,173.4) | 131.1 (74,223.2)       | 161.2 (95.7,225.3)               | <0.001   | 0.02     |
| White blood cell count, *1000/mm <sup>3</sup> | 8.1 (6,11.3)       | 9.5 (6.7,13.7)         | 10.5 (7.2,15.2)                  | <0.001   | 0.004    |
| Lymphocyte, absolute count                    | 1.6 (1.2,2.1)      | 1.3 (0.9,1.8)          | 1.2 (0.9,1.6)                    | <0.001   | 0.02     |
| Neutrophil, absolute count                    | 6 (4.1,8.9)        | 7.3 (4.9,11)           | 8.8 (5.7,12.9)                   | <0.001   | <0.001   |
| Neutrophil to lymphocyte ratio                | 3.8 (2.5,6)        | 5.6 (3.4,9.3)          | 7.5 (4.4,11.6)                   | <0.001   | <0.001   |
| Ferritin                                      | 623 (291,1195.5)   | 690 (331,1283)         | 1175.5 (522,2208.5)              | <0.001   | <0.001   |

|                  |                     |                     |                    |        |        |
|------------------|---------------------|---------------------|--------------------|--------|--------|
| Urinalysis       |                     |                     |                    |        |        |
| Specific Gravity | 1.021 (1.015,1.029) | 1.021 (1.015,1.027) | 1.025 (1.019,1.03) | 0.2    | <0.001 |
| Protein, ≥2+     | 313 (28.3%)         | 160 (48.5%)         | 94 (54.7%)         | <0.001 | 0.2    |
| Blood, ≥2+       | 198 (17.9%)         | 87 (26.4%)          | 55 (32%)           | <0.001 | 0.2    |
| Leucocyte, ≥1+   | 347 (31.4%)         | 115 (34.8%)         | 47 (27.3%)         | 0.7    | 0.09   |

All missing <10% except hsCRP (26%), and urinalysis findings (38%). All variables reported as maximum before AKI onset (except where specified)



**Table S3. Baseline and hospitalization variables by AKI status among patients without COVID-19**

| Variables                                     | No AKI<br>(N=15978) | Stage 1 AKI<br>(N=2579) | Stage 2 or Higher<br>AKI (N=965) | p-value1 | P-<br>value2 |
|-----------------------------------------------|---------------------|-------------------------|----------------------------------|----------|--------------|
| <b>Demographic</b>                            |                     |                         |                                  |          |              |
| Age                                           | 64.4 (50,77.3)      | 70.9 (58.6,81.3)        | 67.8 (55.9,77.9)                 | <0.001   | <0.001       |
| Race, Black                                   | 2337 (14.6%)        | 398 (15.4%)             | 181 (18.8%)                      | 0.04     | 0.9          |
| Ethnicity, Hispanic                           | 2002 (12.5%)        | 263 (10.2%)             | 110 (11.4%)                      | 0.001    | 0.02         |
| Sex, Female                                   | 8159 (51.1%)        | 1266 (49.1%)            | 476 (49.3%)                      | 0.001    | 0.3          |
| <b>Comorbidities</b>                          |                     |                         |                                  |          |              |
| Congestive heart failure                      | 3341 (20.9%)        | 1026 (39.8%)            | 361 (37.4%)                      | <0.001   | 0.2          |
| Chronic obstructive pulmonary disease         | 5451 (34.1%)        | 1023 (39.7%)            | 370 (38.3%)                      | <0.001   | 0.5          |
| Liver disease                                 | 2496 (15.6%)        | 481 (18.7%)             | 250 (25.9%)                      | <0.001   | <0.001       |
| Malignancy                                    | 2833 (17.7%)        | 608 (23.6%)             | 242 (25.1%)                      | <0.001   | 0.4          |
| Chronic Kidney Disease                        | 2191 (13.7%)        | 829 (32.1%)             | 226 (23.4%)                      | <0.001   | <0.001       |
| Hypertension                                  | 9833 (61.5%)        | 1997 (77.4%)            | 742 (76.9%)                      | <0.001   | 0.7          |
| Diabetes                                      | 4446 (27.8%)        | 1079 (41.8%)            | 429 (44.5%)                      | <0.001   | 0.2          |
| Elixhauser comorbidity score                  | 5 (2,8)             | 8 (4,11)                | 8 (5,11)                         | <0.001   | 0.2          |
| <b>Vitals</b>                                 |                     |                         |                                  |          |              |
| Systolic, minimum                             | 101 (92,111)        | 99 (88,114)             | 96 (81,113)                      | <0.001   | <0.001       |
| Diastolic, minimum                            | 55 (49,62)          | 54 (46,63)              | 52 (43.5,63)                     | <0.001   | 0.1          |
| Pulse                                         | 101 (89,115)        | 104 (89,120)            | 107 (90,126)                     | <0.001   | <0.001       |
| Respiratory rate                              | 21 (20,26)          | 22 (20,29)              | 23 (20,31)                       | <0.001   | 0.5          |
| Spo2                                          | 93 (91,95)          | 93 (90,95)              | 94 (89,96)                       | 0.9      | <0.001       |
| Temp                                          | 99.2 (98.8,99.9)    | 99.1 (98.6,100.1)       | 99.1 (98.2,100.4)                | <0.001   | 0.03         |
| <b>Medication Use</b>                         |                     |                         |                                  |          |              |
| Angiotensin converting enzyme inhibitor       | 2260 (14.1%)        | 271 (10.5%)             | 62 (6.4%)                        | <0.001   | <0.001       |
| Aminoglycoside                                | 32 (0.2%)           | 15 (0.6%)               | 4 (0.4%)                         | <0.001   | 0.5          |
| Angiotensin II receptor blocker               | 1822 (11.4%)        | 244 (9.5%)              | 50 (5.2%)                        | <0.001   | <0.001       |
| Diuretics, Potassium sparing                  | 587 (3.7%)          | 120 (4.7%)              | 28 (2.9%)                        | 0.2      | 0.02         |
| Diuretics, Loop                               | 2925 (18.3%)        | 790 (30.6%)             | 225 (23.3%)                      | <0.001   | <0.001       |
| Non-steroidal anti-inflammatory drugs         | 3535 (22.1%)        | 342 (13.3%)             | 89 (9.2%)                        | <0.001   | 0.001        |
| Proton pump inhibitor                         | 5593 (35%)          | 689 (26.7%)             | 191 (19.8%)                      | <0.001   | <0.001       |
| Vasopressor                                   | 1483 (9.3%)         | 323 (12.5%)             | 174 (18%)                        | <0.001   | <0.001       |
| <b>Blood Chemistry</b>                        |                     |                         |                                  |          |              |
| Sodium, mEq/L                                 | 141 (139,142)       | 140 (137,143)           | 140 (136,143)                    | <0.001   | 0.8          |
| Potassium, mEq/L                              | 4.3 (4,4.6)         | 4.4 (4,4.8)             | 4.4 (4,4.9)                      | <0.001   | 0.7          |
| Chloride, mEq/L                               | 106 (103,109)       | 105 (101,109)           | 105 (101,109)                    | <0.001   | 0.9          |
| Anion gap, mEq/L                              | 13 (11,15)          | 14 (12,17)              | 15 (13,18)                       | <0.001   | <0.001       |
| Blood urea nitrogen, mg/dl                    | 18 (13,25)          | 25 (17,36)              | 25 (16,38)                       | <0.001   | 0.9          |
| Creatinine, mg/dl                             | 1 (0.8,1.2)         | 1.2 (0.9,1.6)           | 1.1 (0.8,1.5)                    | <0.001   | <0.001       |
| Glucose, Maximum, mg/dl                       | 141 (117,189)       | 167 (129,239)           | 169 (133,246)                    | <0.001   | 0.2          |
| Glucose, Minimum, mg/dl                       | 92 (83,104)         | 100 (85,122)            | 103 (85,133)                     | <0.001   | 0.005        |
| Hemoglobin, g/dl                              | 13.1 (11.6,14.4)    | 12.4 (10.7,14)          | 12.4 (10.6,14.1)                 | <0.001   | 0.6          |
| Platelet Count, *1000 per mm <sup>3</sup>     | 247 (193,309)       | 239 (184,309)           | 240 (177,327)                    | <0.001   | 0.8          |
| <b>Inflammation</b>                           |                     |                         |                                  |          |              |
| D-dimer                                       | 1.2 (0.6,2.8)       | 1.8 (0.8,5)             | 2.1 (1.1,5.4)                    | <0.001   | 0.09         |
| C-reactive protein, high sensitivity          | 33.6 (5.8,115.7)    | 47.6 (7.9,148.4)        | 75.1 (17.7,206.8)                | <0.001   | 0.01         |
| White blood cell count, *1000/mm <sup>3</sup> | 10.4 (7.8,13.8)     | 11.3 (8.3,15.2)         | 12.3 (8.8,17.3)                  | <0.001   | <0.001       |
| Lymphocyte, absolute count                    | 1.8 (1.3,2.4)       | 1.5 (1,2.1)             | 1.4 (1,2.1)                      | <0.001   | 0.2          |
| Neutrophil, absolute count                    | 7.8 (5.3,11)        | 8.8 (5.9,12.5)          | 9.7 (6.3,14.1)                   | <0.001   | <0.001       |
| Neutrophil to lymphocyte ratio                | 4.4 (2.7,7)         | 5.8 (3.4,9.9)           | 6.5 (3.7,11.2)                   | <0.001   | <0.001       |

|                  |                    |                     |                     |        |        |
|------------------|--------------------|---------------------|---------------------|--------|--------|
| Ferritin         | 182 (65,441)       | 222 (96,545)        | 304 (106,844)       | <0.001 | 0.1    |
| Urinalysis       |                    |                     |                     |        |        |
| Specific Gravity | 1.02 (1.013,1.027) | 1.018 (1.013,1.025) | 1.021 (1.015,1.029) | 0.2    | <0.001 |
| Protein, ≥2+     | 1225 (13.8%)       | 349 (26.6%)         | 116 (26.4%)         | <0.001 | 0.9    |
| Blood, ≥2+       | 1706 (19.2%)       | 324 (24.7%)         | 135 (30.7%)         | <0.001 | 0.01   |
| Leucocyte, ≥1+   | 3015 (34%)         | 483 (36.8%)         | 155 (35.2%)         | 0.05   | 0.5    |

All missing <10% except D-dimer (86%), ferritin (86%), hsCRP (85%), and urinalysis findings (46%). All variables reported as maximum before AKI onset (except where specified)

**Table S4. Baseline characteristics of historical controls**

| Variables                                                        | COVID-19 Positive (N=2600) | COVID-19 Negative (N=19522) | Historical Control (N=26543) |
|------------------------------------------------------------------|----------------------------|-----------------------------|------------------------------|
| <b>Demographic</b>                                               |                            |                             |                              |
| Age                                                              | 65.6 (52.5,79.6)           | 65.5 (51.7,78)              | 65.9 (52.6,78.2)             |
| Race, Black                                                      | 646 (24.8%)                | 2916 (14.9%)                | 3783 (14.3%)                 |
| Sex, Female                                                      | 1280 (49.2%)               | 9901 (50.7%)                | 13580 (51.2%)                |
| Ethnicity, Hispanic                                              | 725 (27.9%)                | 2375 (12.2%)                | 3169 (11.9%)                 |
| <b>Comorbidities</b>                                             |                            |                             |                              |
| Congestive heart failure                                         | 502 (19.3%)                | 4728 (24.2%)                | 5633 (21.2%)                 |
| Chronic obstructive pulmonary disease                            | 831 (32%)                  | 6844 (35.1%)                | 8729 (32.9%)                 |
| Liver disease                                                    | 270 (10.4%)                | 3227 (16.5%)                | 3575 (13.5%)                 |
| Malignancy                                                       | 295 (11.3%)                | 3683 (18.9%)                | 1693 (6.4%)                  |
| Chronic Kidney Disease                                           | 426 (16.4%)                | 3246 (16.6%)                | 4107 (15.5%)                 |
| Hypertension                                                     | 1658 (63.8%)               | 12572 (64.4%)               | 16012 (60.3%)                |
| Diabetes                                                         | 997 (38.3%)                | 5954 (30.5%)                | 7409 (27.9%)                 |
| Elixhauser comorbidity score                                     | 5 (2,8)                    | 5 (2,9)                     | 4 (1,8)                      |
| <b>Vitals on Admission</b>                                       |                            |                             |                              |
| Systolic blood pressure                                          | 132 (118,148)              | 137 (121,156)               | 136 (120,154)                |
| Diastolic blood pressure                                         | 76 (66,85)                 | 79 (69,89)                  | 78 (68,88)                   |
| Pulse rate                                                       | 94 (80,109)                | 87 (74,102)                 | 85 (72,99)                   |
| Respiratory rate                                                 | 20 (18,22)                 | 18 (17,20)                  | 18 (17,20)                   |
| Pulse oximetry oxygen saturation                                 | 96 (93,98)                 | 97 (96,99)                  | 97 (96,99)                   |
| Temperature                                                      | 98.9 (98,100.4)            | 98 (97.5,98.6)              | 98 (97.5,98.6)               |
| <b>Blood laboratory findings on Admission</b>                    |                            |                             |                              |
| Blood urea nitrogen, mg/dl                                       | 17 (11,26)                 | 17 (12,25)                  | 17 (12,24)                   |
| Creatinine, mg/dl                                                | 1 (0.8,1.3)                | 1 (0.8,1.3)                 | 0.9 (0.7,1.2)                |
| Estimated glomerular filtration rate, ml/min/1.73 m <sup>2</sup> | 76.7 (52.6,97.1)           | 76.2 (55.1,95.9)            | 78 (56.5,96.3)               |
| Chloride, mEq/L                                                  | 100 (97,104)               | 102 (99,105)                | 103 (99,106)                 |
| Glucose, g/dl                                                    | 123 (105,162)              | 120 (102,151)               | 119 (102,149)                |
| Potassium, mEq/L                                                 | 4 (3.7,4.4)                | 4 (3.7,4.4)                 | 4.1 (3.7,4.4)                |
| Sodium, mEq/L                                                    | 137 (134,140)              | 138 (135,140)               | 139 (136,141)                |
| Hemoglobin, g/dl                                                 | 13.2 (11.8,14.4)           | 12.8 (11.1,14.2)            | 12.5 (11,13.9)               |
| Platelet count, *1000/mm <sup>3</sup>                            | 206 (161,262)              | 230 (178,289)               | 224 (175,281)                |
| White blood cell count, *1000/mm <sup>3</sup>                    | 6.7 (5.1,9.2)              | 9.2 (6.9,12.3)              | 9.2 (6.9,12.3)               |
| <b>Urinalysis findings</b>                                       |                            |                             |                              |
| Specific gravity                                                 | 1.02 (1.015,1.027)         | 1.018 (1.013,1.026)         | 1.017 (1.011,1.025)          |
| Protein, ≥2+                                                     | 598 (33.4%)                | 1790 (15.4%)                | 2347 (16.4%)                 |
| Blood, ≥2+                                                       | 354 (19.8%)                | 2184 (19.1%)                | 2626 (18.3%)                 |
| Leucocyte, ≥1+                                                   | 494 (27.6%)                | 3504 (30.6%)                | 4447 (31%)                   |

**Table S5. Acute kidney injury and other outcomes between COVID-19 positive patients compared with historical controls**

| Variables                                            | COVID-19 Positive<br>(N=2600) | COVID-19 Negative<br>(N=19522) | Historical Control<br>(N=26543) |
|------------------------------------------------------|-------------------------------|--------------------------------|---------------------------------|
| Acute kidney injury                                  | 796 (30.6%)                   | 3544 (18.2%)                   | 4773 (18%)                      |
| Stage 1                                              | 508 (19.5%)                   | 2579 (13.2%)                   | 3588 (13.5%)                    |
| Stage 2                                              | 153 (5.9%)                    | 594 (3%)                       | 763 (2.9%)                      |
| Stage 3                                              | 135 (5.2%)                    | 371 (1.9%)                     | 422 (1.6%)                      |
| Dialysis                                             | 68 (8.5%)                     | 127 (3.6%)                     | 159 (3.3%)                      |
| Time from hospital admission to first dialysis, days | 6.1 (3.7,11)                  | 5.1 (1.8,12.5)                 | 3 (1.2,9.1)                     |
| Duration of inpatient dialysis, days                 | 10.1 (1,21.9)                 | 4.1 (1,13.7)                   | 5.7 (1.6,18.3)                  |
| AKI on admission                                     | 129 (5.0%)                    | 941 (4.8%)                     | 1075 (4.1%)                     |
| ICU admission                                        | 654 (25.2%)                   | 4759 (24.4%)                   | 6536 (24.6%)                    |
| Length of stay in ICU, days                          | 4.9 (1.8,11.1)                | 2.3 (1.2,4.7)                  | 2.4 (1.2,4.7)                   |
| Ventilator requirement                               | 377 (14.5%)                   | 1186 (6.1%)                    | 1755 (6.6%)                     |
| Vasopressor requirement                              | 369 (14.2%)                   | 2329 (11.9%)                   | 3369 (12.7%)                    |
| AKI recovery (at discharge)                          | 462 (58%)                     | 2473 (69.8%)                   | 3370 (70.6%)                    |
| Length of hospital stay, days                        | 8 (4.5,14.8)                  | 4 (2.4,7)                      | 4 (2.6,7)                       |
| Death, overall                                       | 383 (14.7%)                   | 612 (3.1%)                     | 555 (2.1%)                      |
| Death, among those with AKI                          | 236 (29.6%)                   | 401 (11.3%)                    | 391 (8.2%)                      |

AKI recovery was defined as last creatinine prior to discharge that is  $<1.5 \times$  baseline creatinine  
 ICU, intensive care unit; AKI, acute kidney injury; COVID, Coronavirus Disease

**Table S6. Subgroup analysis for patients hospitalized in the intensive care unit**

| Variables                                            | COVID-19 Positive<br>(N=654) | COVID-19 Negative<br>(N=4759) | Risk difference<br>% (95% CI) |
|------------------------------------------------------|------------------------------|-------------------------------|-------------------------------|
| Acute kidney injury                                  | 377 (57.6%)                  | 1532 (32.2%)                  | 25.5 (21.4, 29.5)             |
| Stage 1                                              | 190 (29.1%)                  | 1014 (21.3%)                  | 7.7 (4.1, 11.4)               |
| Stage 2                                              | 87 (13.3%)                   | 270 (5.7%)                    | 7.6 (4.9, 10.3)               |
| Stage 3                                              | 100 (15.3%)                  | 248 (5.2%)                    | 10.1 (7.2, 12.9)              |
| Dialysis                                             | 55 (8.4%)                    | 115 (2.4%)                    | 6 (3.8, 8.2)                  |
| Time from hospital admission to first dialysis, days | 6.6 (3.8,10.7)               | 5 (1.7,12.8)                  | 1.5 (-0.8, 3.8)               |
| Duration of inpatient dialysis, days                 | 12.5 (1,23.7)                | 3.6 (1,14)                    | 8.8 (2.6, 15.1)               |
| Length of stay in ICU, days                          | 4.9 (1.8,11.1)               | 2.3 (1.2,4.7)                 | 2.6 (1.9, 3.3)                |
| Ventilator requirement                               | 317 (48.5%)                  | 1129 (23.7%)                  | 24.7 (20.7, 28.8)             |
| Vasopressor requirement                              | 299 (45.7%)                  | 1503 (31.6%)                  | 14.1 (10.1, 18.2)             |
| AKI recovery (at discharge)                          | 187 (49.6%)                  | 956 (62.4%)                   | -12.8 (-18.4, -7.2)           |
| Length of hospital stay, days                        | 14.5 (8.2,24.5)              | 5.9 (3.2,10.7)                | 8.6 (7.7, 9.4)                |
| Death, overall                                       | 194 (29.7%)                  | 459 (9.6%)                    | 20 (16.4, 23.6)               |
| Death, among those with AKI                          | 151 (40.1%)                  | 328 (21.4%)                   | 18.6 (13.3, 24)               |
